# Supplementary material for: Differential Effect of Smoking on Gene Expression in Head and Neck Cancer Patients
Source: Int J Environ Res Public Health. 2018 Jul 23;15(7):1558. doi: 10.3390/ijerph15071558 (PMC6069101; doi:10.3390/ijerph15071558)
Supplement: Supplementary file 1 [file ijerph-15-01558-s001.pdf]

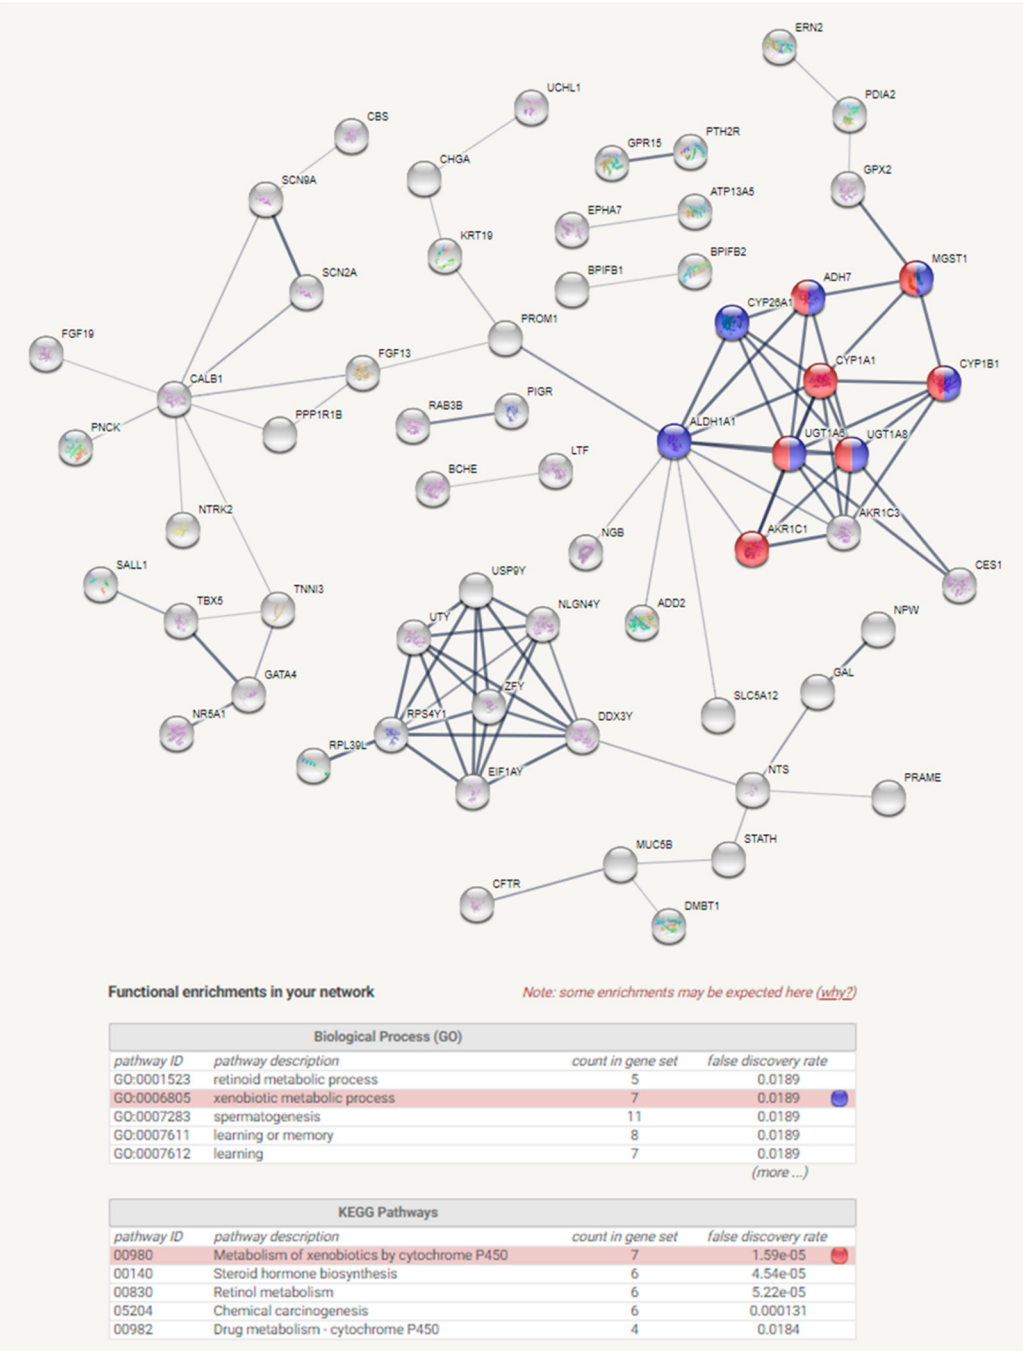

**Figure S1.** String Network emphasizing the genes responsible for the metabolism of xenobiotics by cytochrome P450 (red dots) and the genes involved in xenobiotic metabolic processes (blue dots).

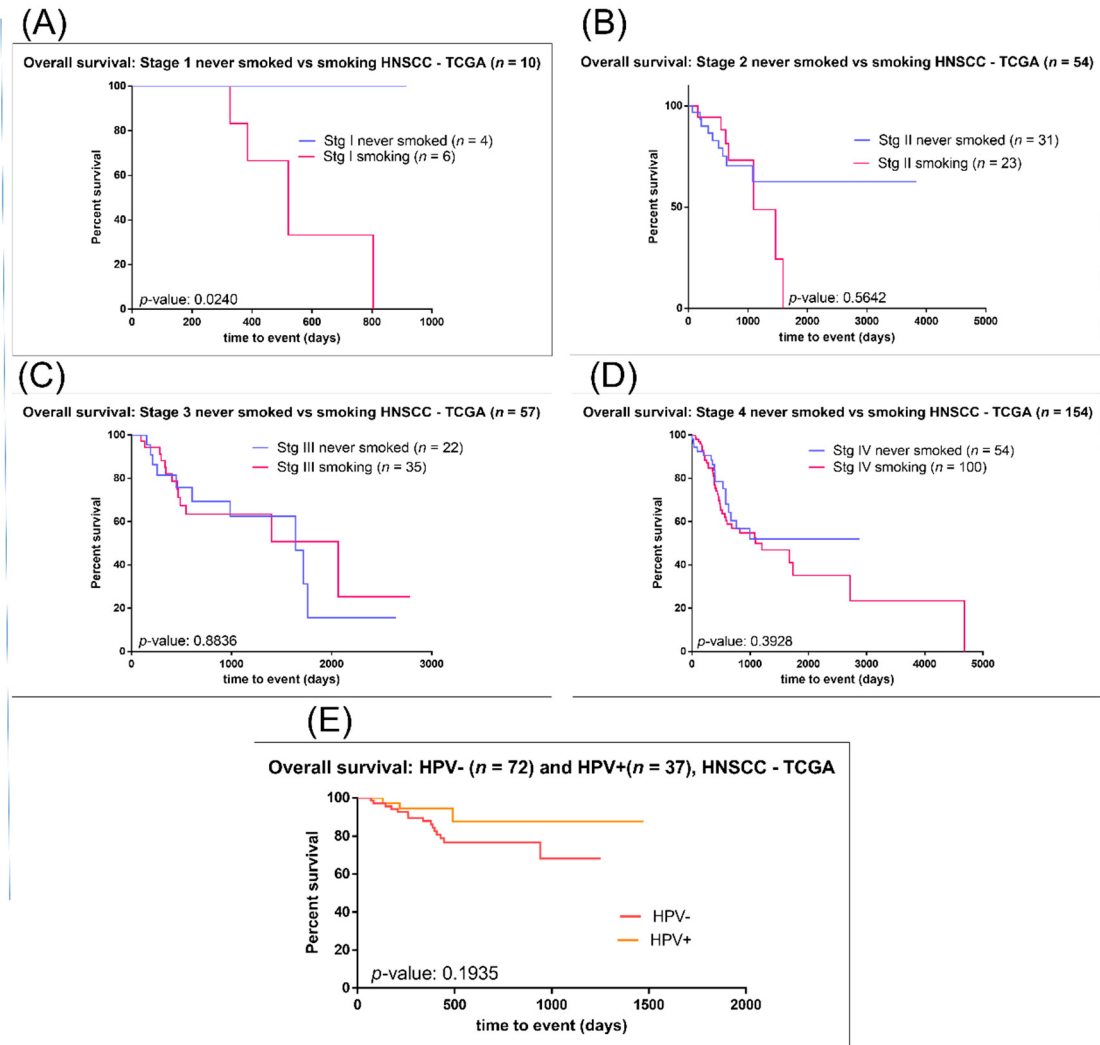

**Figure S2.** Overall survival of patients with HNSCCs based on smoking status (currently smoking, ex-smokers and never smoked), (A) for stage I; (B) stage II; (C) stage III; (D) stage IV and (E) related to HPV status (HPV-, HPV+).
